# Supplementary material for: Kinetics of cooperative CO2 adsorption in diamine-appended variants of the metal–organic framework Mg2(dobpdc)
Source: Royal Society of Chemistry journal article supplement (doi:10.1039/d0sc01087a), 2020-01-01
Supplement: d0sc01087a1.pdf [file d0sc01087a1.pdf]

Supporting Information for

**Kinetics of Cooperative CO<sub>2</sub> Adsorption in Diamine-Appended Variants of the Metal–Organic Framework Mg<sub>2</sub>(dobpdc)**

Authors: Jeffrey D. Martell,<sup>a,b,e</sup> Phillip J. Milner,<sup>a,b,f</sup> Rebecca L. Siegelman,<sup>b,g</sup> Jeffrey R. Long<sup>\*,b,c,d</sup>

<sup>a</sup>These authors contributed equally to this work

<sup>b</sup>Department of Chemistry, University of California, Berkeley, CA 94720, United States

<sup>c</sup>Department of Chemical and Biomolecular Engineering, University of California, Berkeley, CA 94720, United States

<sup>d</sup>Materials Sciences Division, Lawrence Berkeley National Laboratory, Berkeley, CA 94720, United States

<sup>e</sup>Present address: University of Wisconsin–Madison, Department of Chemistry, 1101 University Avenue, Madison, WI 53706, United States

<sup>f</sup>Present address: 328 Baker Laboratory, Cornell University, Ithaca, NY 14853, United States

<sup>g</sup>Present address: DuPont de Nemours, Inc. 200 Powder Mill Rd, Wilmington, DE 19803, United States

\*To whom correspondence should be addressed: [jrlong@berkeley.edu](mailto:jrlong@berkeley.edu)

## EXPERIMENTAL SECTION

**General procedures, materials, and reagents.** All solvents and diamines were purchased from commercial sources and used as received. The ligand 4,4'-dihydroxy-(1,1'-biphenyl)-3,3'-dicarboxylic acid ( $\text{H}_4\text{dobpdc}$ ) was purchased from Hangzhou Trylead Chemical Technology Co.

**Synthesis of  $\text{Mg}_2(\text{dobpdc})$ .** The compound  $\text{Mg}_2(\text{dobpdc})$  was synthesized as described previously<sup>1</sup> with slight modifications to the procedure. The ligand  $\text{H}_4\text{dobpdc}$  (9.89 g, 36.1 mmol) and  $\text{Mg}(\text{NO}_3)_2 \cdot 6\text{H}_2\text{O}$  (11.5 g, 44.9 mmol) were dissolved in 200 mL of 55:45 (v:v) methanol:*N,N*-dimethylformamide (DMF) using sonication. The solution was filtered through filter paper to remove any undissolved particulates and added to a 350-mL glass pressure vessel equipped with a stir bar. The reaction mixture was sparged with  $\text{N}_2$  for 1 h. The reactor was sealed with a Teflon cap and heated in a silicone oil bath at 120 °C for 14 h with slow stirring (approximately 120 min<sup>-1</sup> stirring rate). The non-homogenous mixture was filtered, and the solid was quickly transferred to a Pyrex jar containing 250 mL of *N,N*-dimethylformamide (DMF). The jar was placed in an oven that had been preheated to 60 °C and allowed to stand for at least 3 h. The jar was then allowed to cool to room temperature, and the solvent was decanted and replaced with 250 mL of fresh DMF. The jar was heated again to 60 °C, and this washing process was repeated two additional times. Next, the DMF was replaced with 250 mL of methanol, and the same washing process was repeated an additional three times using methanol to afford methanol-solvated  $\text{Mg}_2(\text{dobpdc})$  as a white powder.

**Synthesis of diamine-appended variants of  $\text{Mg}_2(\text{dobpdc})$ .** Diamine-appended variants of  $\text{Mg}_2(\text{dobpdc})$  were synthesized as described previously.<sup>2</sup> Although some previously published procedures<sup>1</sup> involved sonication of a slurry of  $\text{Mg}_2(\text{dobpdc})$  in the diamine solution, no sonication was used during diamine grafting in this study so as to minimize possible variations in particle size among samples. Diamine loadings were determined by suspending ~5 mg of the diamine-appended metal-organic framework in 0.5 mL of  $\text{DMSO}-d_6$ , adding several drops of  $\text{DCl}$  (35 wt % in  $\text{D}_2\text{O}$ ), heating until the mixture became homogeneous, and analyzing the resulting solution by  $^1\text{H}$  NMR spectroscopy.

**Thermogravimetric analysis.** Thermogravimetric analysis (TGA) experiments were conducted using a TA Instruments TGA Q5000. Masses were uncorrected for buoyancy effects. Custom CO<sub>2</sub>/N<sub>2</sub> blends (15% and 5% CO<sub>2</sub> in N<sub>2</sub>) were purchased from Praxair. In all experiments, a flow rate of 25 mL/min was used, unless indicated otherwise. All experiments were performed at atmospheric pressure. Upon switching gas streams, a delay of 19 s was observed prior to the sample mass increasing, corresponding to the time required for CO<sub>2</sub> to reach the sample in the TGA furnace. Except where indicated otherwise,  $t = 0$  corresponds to the time at which the gas stream within the TGA was switched (*i.e.*, 19 s before the new gas stream reached the sample). Adsorption isobars were performed as described previously,<sup>3</sup> with cooling ramp rates indicated in the figure legends. Adsorption kinetics experiments were performed by activating the sample under flowing N<sub>2</sub> for 15–30 min (at temperatures indicated in each figure legend) until the mass stabilized, followed by cooling to a temperature of interest, equilibration of the temperature, and switching the gas flow to a CO<sub>2</sub>-containing stream. The sample was held isothermally until the mass stabilized, after which the sample was reactivated under N<sub>2</sub> (time and temperature specified in each figure legend), cooled to a new temperature of interest, then exposed again to the CO<sub>2</sub>-containing stream. For plots in which kinetics experiments at multiple temperatures are presented for the same material, the exact same sample of the material was used for all temperatures (*i.e.*, the sample was re-activated and re-analyzed multiple times while keeping the same sample within the TGA furnace). Desorption kinetics of CO<sub>2</sub> under a dry N<sub>2</sub> stream were examined by activating adsorbents *in situ* in the TGA furnace as described above, exposing them to pure CO<sub>2</sub> at a sufficiently low temperature to reach full occupancy, heating the sample to the temperature of interest under pure CO<sub>2</sub>, equilibrating the temperature, and finally switching the gas stream to dry N<sub>2</sub>. The sample was held isothermally while the decrease in sample mass was monitored. The same sample was then exposed again to pure CO<sub>2</sub> to reach full occupancy, and a new desorption temperature was investigated using the same procedure.

**Fitting TGA adsorption kinetics data to the Avrami or first-order model.** In order to fit the data, the time points were normalized such that  $t = 0$  corresponded to the data point immediately before mass increase was observed due to CO<sub>2</sub> adsorption (*i.e.*,  $t = 0$  is after the 19-s delay prior to CO<sub>2</sub> reaching the sample in the furnace). Kinetic parameters ( $k_1$  for pseudo-first order model;  $k_A$  and  $n_A$  for the Avrami model) were fit by minimizing the sum of the squared

residuals between the experimental ( $Q_{expt}$ ) and predicted ( $Q_{pred}$ ) occupancies, or  $\sum(Q_{expt} - Q_{pred})^2$ , using eqns (1) and (2). All adsorption experiments for which fits were prepared were run for a sufficiently long time to allow the amount of CO<sub>2</sub> adsorbed to stabilize, and the equilibrium occupancy  $Q_e$  was determined for each measurement by averaging the last 5 data points of the experiment.

**Fitting Arrhenius plots with logarithmic functions.** Logarithmic fits to the data in the Arrhenius plots of  $\ln(k_A)$  vs.  $1/T$  were functions of the form:  $y = a + b \cdot \ln(x + c)$ ; see Figures S13–18. The parameters  $a$ ,  $b$ , and  $c$  were fit by minimizing the sum of the squared residuals between the experimental and predicted  $\ln(k_A)$  values.

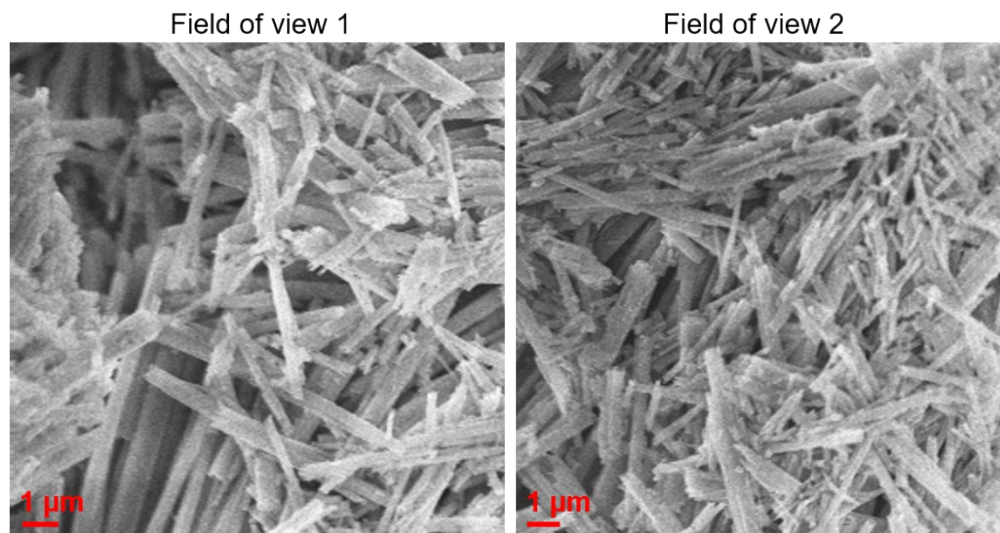

**Fig. S1.** Scanning electron microscopy images of  $\text{Mg}_2(\text{dobpdc})$  used in this study. Two representative fields of view are shown. In general, the rod-shaped crystallites have an aspect ratio of approximately 10. The crystallites are heterogeneous in size, exhibiting widths ranging from  $\sim 60$  nm to  $>1$   $\mu\text{m}$ . Samples were prepared for SEM and micrographs were recorded as described previously.<sup>3</sup>

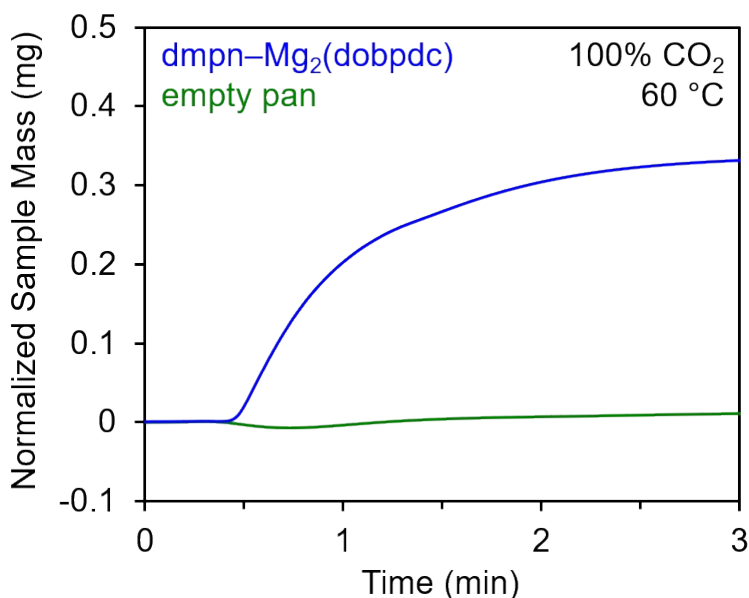

**Fig. S2.** Effect of buoyancy on apparent sample mass is negligible compared to the mass of  $\text{CO}_2$  adsorbed by diamine- $\text{Mg}_2(\text{dobpdc})$ . A flow rate of 25 mL/min was used in this experiment. An empty pan (green) or activated dmpn- $\text{Mg}_2(\text{dobpdc})$  (blue) was equilibrated at  $60^\circ\text{C}$  under flowing  $\text{N}_2$ , and the gas flow was switched to  $\text{CO}_2$ . The mass of the activated dmpn- $\text{Mg}_2(\text{dobpdc})$  sample was 2.48 mg, and the amount of  $\text{CO}_2$  adsorbed at  $t = 3$  min was 0.33 mg, which corresponds to 13.4 g/100 g.

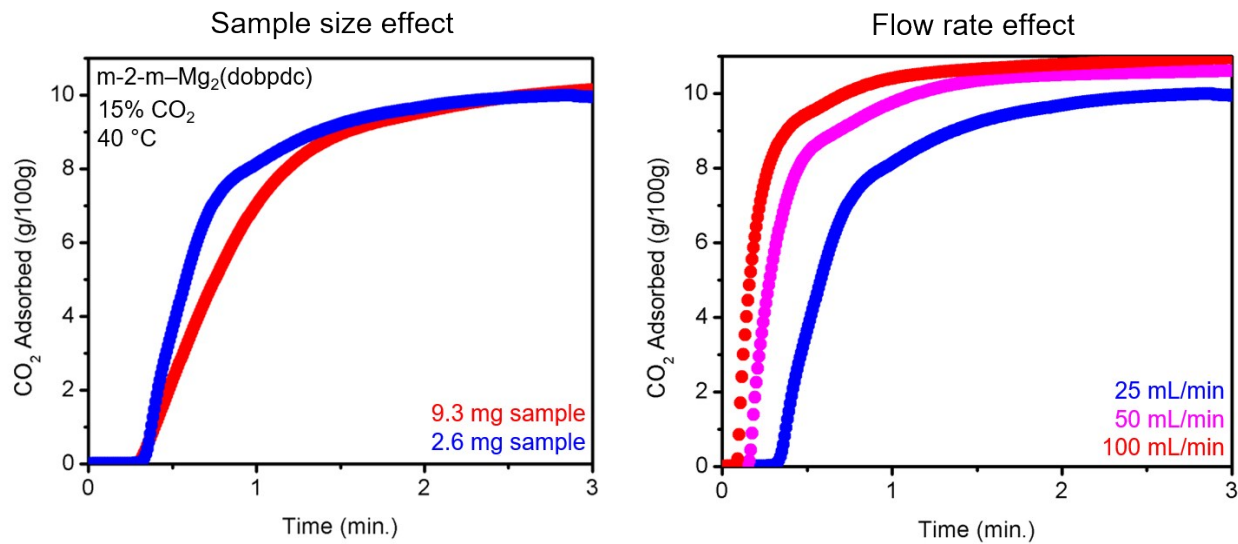

**Fig. S3.** Effect of sample size (left) and flow rate (right) on apparent adsorption kinetics in a thermogravimetric analysis (TGA) assay. Smaller sample masses and faster flow rates lead to faster apparent adsorption kinetics. These data were collected for m-2-m-Mg<sub>2</sub>(dobpdc) at 40 °C from a 15% CO<sub>2</sub> stream. Note that faster flow rates lead to a shortening of the time required for CO<sub>2</sub> to reach the sample in the furnace, as expected.

**Table S1: Delay Prior to Maximum Rate for CO<sub>2</sub> Adsorption by Bare Mg<sub>2</sub>(dobpdc) from a 100% CO<sub>2</sub> Stream (Corresponding to Data in Fig. 3H in Main Text)**

| <b>Temperature (°C)</b> | <b>Time of First Mass Increase (s)</b> | <b>Time at Which Maximum Rate Was Observed (s)</b> | <b>Delay Prior to Maximum Rate (s)</b> |
|-------------------------|----------------------------------------|----------------------------------------------------|----------------------------------------|
| 30                      | 19                                     | 42                                                 | 23                                     |
| 40                      | 19                                     | 40                                                 | 21                                     |
| 50                      | 19                                     | 38                                                 | 19                                     |
| 60                      | 19                                     | 37                                                 | 18                                     |
| 70                      | 19                                     | 36                                                 | 17                                     |
| 80                      | 19                                     | 35                                                 | 16                                     |
| 90                      | 19                                     | 34                                                 | 15                                     |
| 100                     | 19                                     | 34                                                 | 15                                     |
| 110                     | 19                                     | 33                                                 | 14                                     |
| 120                     | 19                                     | 33                                                 | 14                                     |

The data in this table correspond to Fig. 3H in the main text, which presents rate *vs.* time for CO<sub>2</sub> adsorption by bare Mg<sub>2</sub>(dobpdc) from a 100% CO<sub>2</sub> stream at varying temperatures. The adsorbent was activated under N<sub>2</sub>, cooled to the temperature of interest, and the gas stream was switched to 100% CO<sub>2</sub>. As stated in the main text, CO<sub>2</sub> adsorption kinetics in this material are expected to be diffusion-limited. Therefore, any delay prior to reaching the maximum rate of CO<sub>2</sub> adsorption can be treated as a rough approximation of the time required for complete exchange of CO<sub>2</sub> for N<sub>2</sub> in the furnace atmosphere. The time at which the maximum rate was observed varied from 33–42 s, depending on the temperature. The sample mass did not begin increasing until 19 s, reflecting the time required for CO<sub>2</sub> to reach the sample within the furnace due to the design of the instrumentation. Therefore, the delay between CO<sub>2</sub> first reaching the sample and the time of maximum rate was 14–23 s, depending on the temperature. These delay times represent approximate lower bounds on the time required for the furnace atmosphere to change from 100% N<sub>2</sub> to 100% CO<sub>2</sub>.

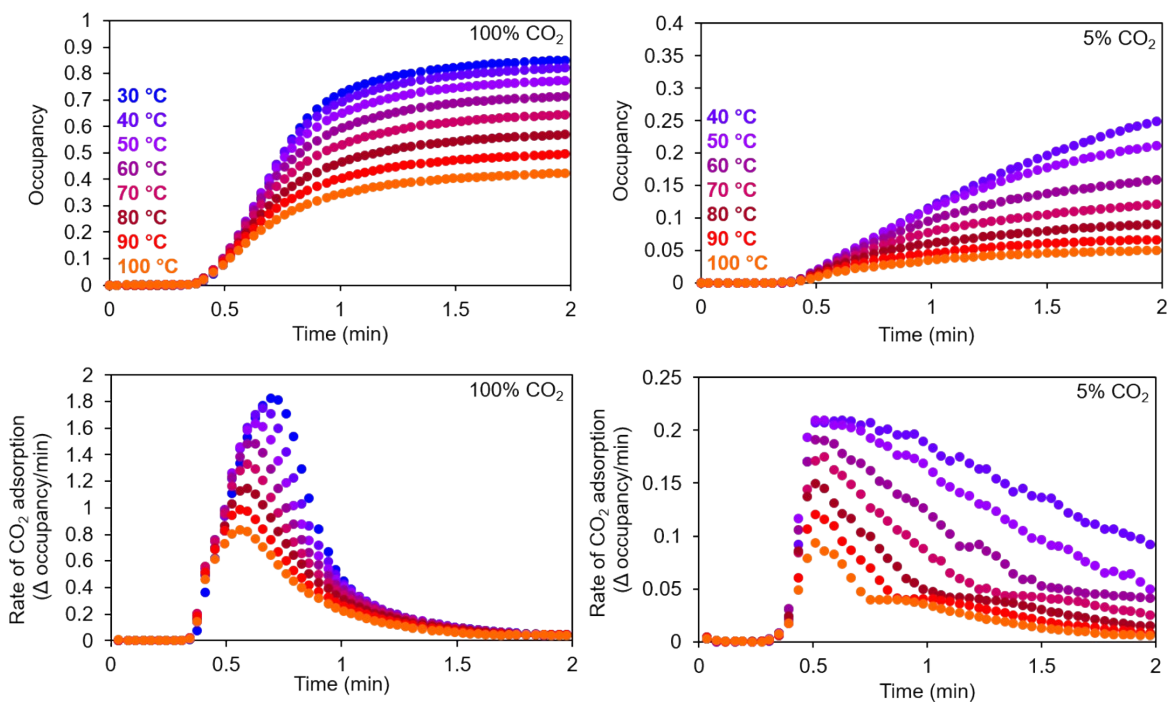

**Fig. S4.** Rate of CO<sub>2</sub> adsorption in bare Mg<sub>2</sub>(dobpdc) from a 100% CO<sub>2</sub> stream (left column) or a 5% CO<sub>2</sub> stream (right column) at the temperatures indicated. Plots of occupancy vs. time are shown in the top row, and plots of adsorption rate vs. time are shown in the bottom row. Occupancy of 1.0 = 27.6 g/100 g.



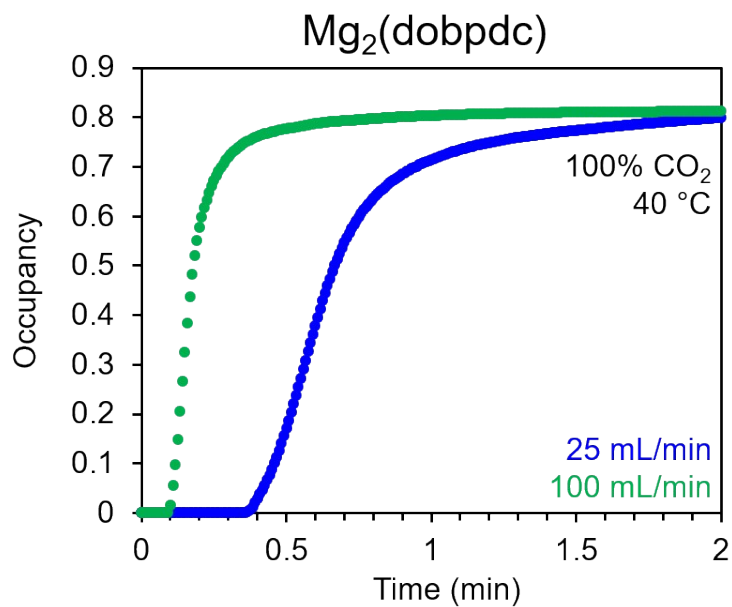

**Fig. S5.** Effect of TGA flow rate on  $\text{CO}_2$  adsorption kinetics in bare  $\text{Mg}_2(\text{dobpdc})$ . Occupancy of 1.0 = 27.6 g/100 g. Note that faster flow rates lead to a shortening of the time required for  $\text{CO}_2$  to reach the sample in the furnace, as expected.

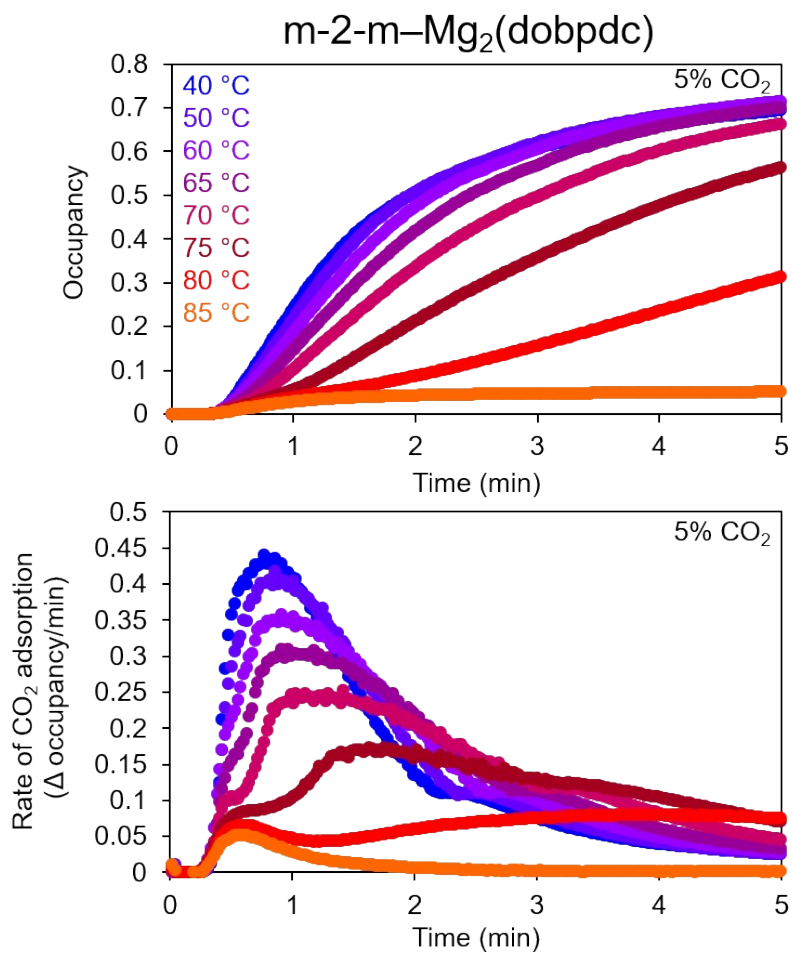

**Fig. S6.** Adsorption kinetics from a 5% CO<sub>2</sub> stream by m-2-m-Mg<sub>2</sub>(dobpdc) at the temperatures indicated. The upper plot presents the fraction of CO<sub>2</sub> sites occupied *vs.* time, and the lower plot presents rate of CO<sub>2</sub> adsorption *vs.* time. Occupancy of 1.0 = 17.8 g/100 g.

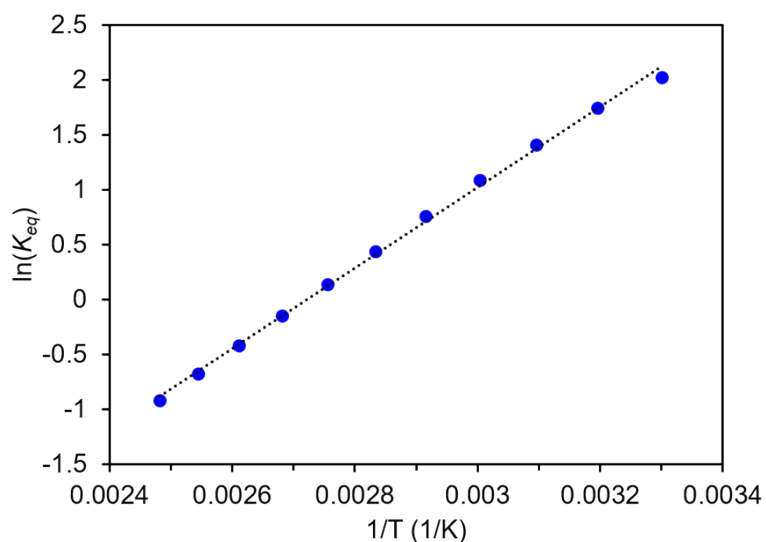

**Fig. S7.** Van't Hoff plot depicting the equilibrium CO<sub>2</sub> adsorption capacity with varying temperature for Mg<sub>2</sub>(dobpdc) from a 100% CO<sub>2</sub> stream. These are the same data depicted in Fig. 4 in the main text, corresponding to temperatures from 30 to 130 °C. A linear fit is included ( $R^2 = 0.998$ ). An estimation of  $\Delta h$  of CO<sub>2</sub> adsorption in bare Mg<sub>2</sub>(dobpdc) can be made based on the assumption that the slope of the linear fit equals  $-\Delta h/R$ . When the data points corresponding to the temperatures 30–130 °C are included, this analysis yields  $\Delta h = -30.5$  kJ/mol. These values are slightly different from the  $\Delta h$  values previously reported for this material based on CO<sub>2</sub> adsorption isotherms: approximately  $-44$  kJ/mol at low loadings and approximately  $-40$  kJ/mol at a loading of 3.5 mmol/g.<sup>4</sup> This discrepancy may be due to N<sub>2</sub> being bound to a small fraction of the metal sites prior to CO<sub>2</sub> exposure in the TGA experiment.<sup>5</sup> In contrast, in the previously reported gas adsorption isotherms, CO<sub>2</sub> was dosed into a sample that had been activated under vacuum (*i.e.*, no N<sub>2</sub> was present).<sup>4</sup>

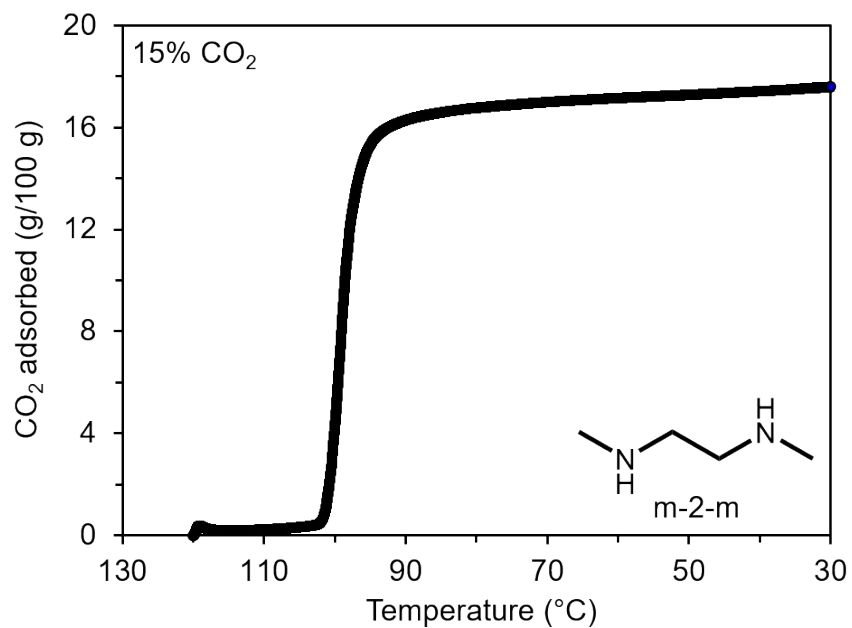

**Fig. S8.** 15% CO<sub>2</sub> adsorption isobar for m-2-m-Mg<sub>2</sub>(dobpdc). A ramp rate of 0.5 °C/min was used. The onset of the CO<sub>2</sub> adsorption step is at 102 °C.

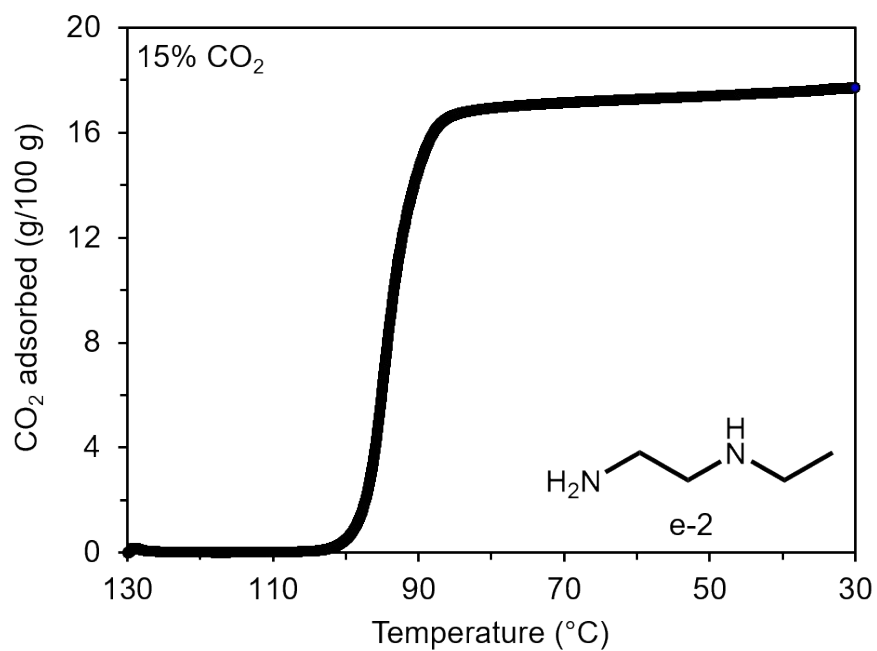

**Fig. S9.** 15% CO<sub>2</sub> adsorption isobar for e-2-Mg<sub>2</sub>(dobpdc). A ramp rate of 0.5 °C/min was used. The onset of the CO<sub>2</sub> adsorption step is at 98 °C.

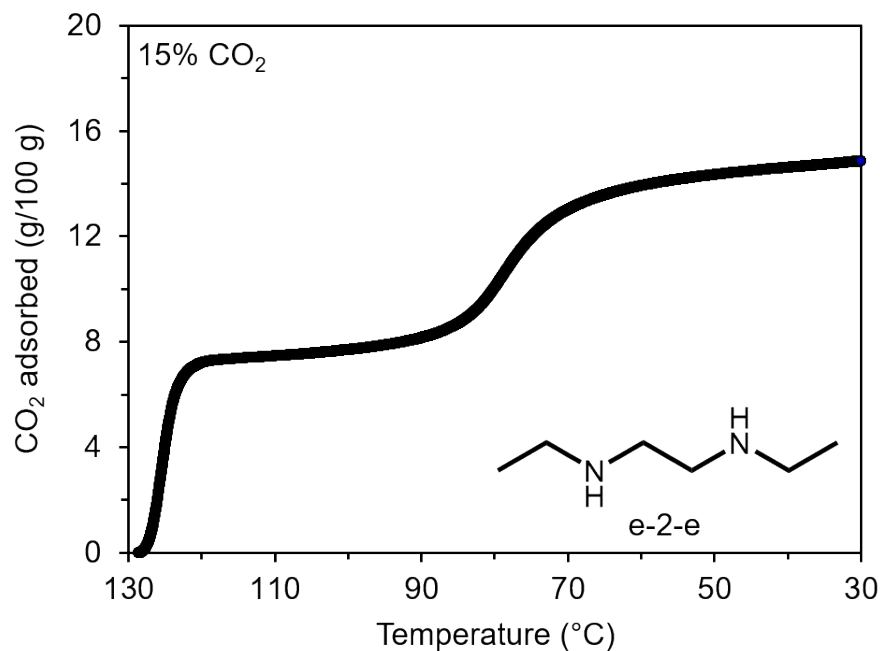

**Fig. S10.** 15% CO<sub>2</sub> adsorption isobar for e-2-e-Mg<sub>2</sub>(dobpdc). A ramp rate of 0.5 °C/min was used. The onset of the CO<sub>2</sub> adsorption step is at 128 °C. As noted in the main text, this material exhibits a two-step adsorption profile, and Fig. 9 only depicts temperatures under which the low-temperature step was not operative for this material.

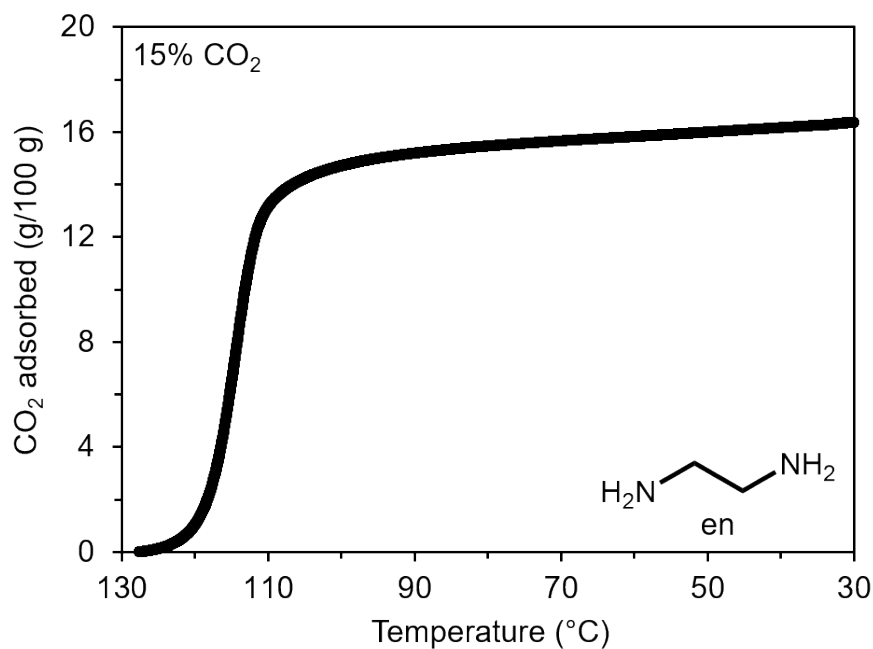

**Fig. S11.** 15% CO<sub>2</sub> adsorption isobar for en-Mg<sub>2</sub>(dobpdc). A ramp rate of 0.5 °C/min was used. The onset of the CO<sub>2</sub> adsorption step is at 120 °C.

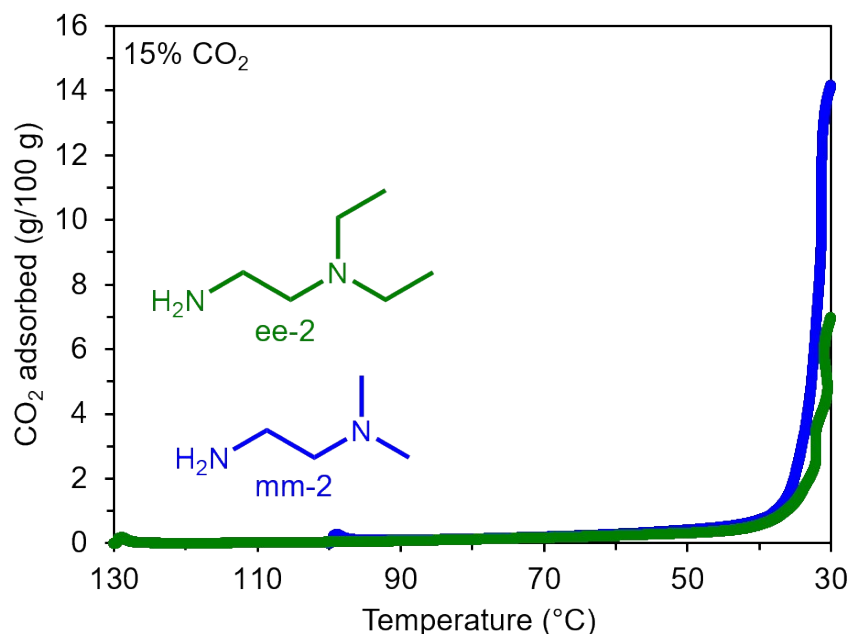

**Fig. S12.** 15% CO<sub>2</sub> adsorption isobars for ee-2-Mg<sub>2</sub>(dobpdc) and mm-2-Mg<sub>2</sub>(dobpdc). A ramp rate of 0.5 °C/min was used in both experiments. Minimal uptake of CO<sub>2</sub> was observed in both materials at temperatures above 40 °C.

**Table S2: Comparison of 15% CO<sub>2</sub> Adsorption Step Positions Determined from Isobars or Linear Fits of  $k_A$  vs.  $T$**

| Diamine-Appended Mg <sub>2</sub> (dobpdc) Variant* | $T_{step}$ (°C) Determined from Isobars | $T_{step}$ (°C) Determined from $x$ -Intercepts of Linear $k_A$ vs. $T$ Plots |
|----------------------------------------------------|-----------------------------------------|-------------------------------------------------------------------------------|
| m-2-m                                              | 102                                     | 100                                                                           |
| e-2-e                                              | 128                                     | 127                                                                           |
| m-2                                                | N.D.                                    | 102                                                                           |
| e-2                                                | 98                                      | 96                                                                            |
| i-2                                                | N.D.                                    | 100                                                                           |
| en                                                 | 120                                     | 117                                                                           |

\*Note: Data are not included for  $\pm$ -*trans*-dach-Mg<sub>2</sub>(dobpdc) because  $T_{step}$  could not be determined from the  $k_A$  vs.  $T$  plot; see Fig. S20.

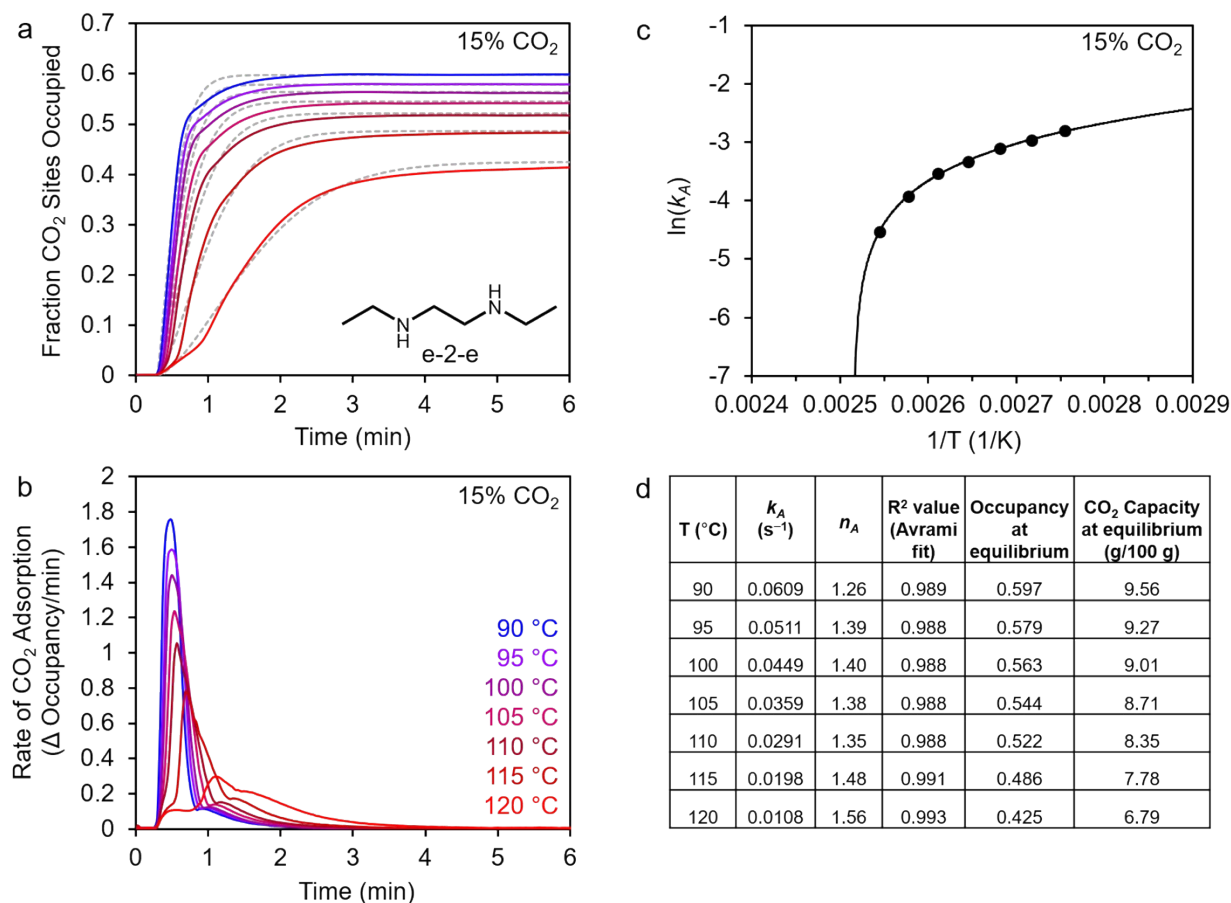

**Fig. S13.** Adsorption of CO<sub>2</sub> from a 15% stream by e-2-e-Mg<sub>2</sub>(dobpdc). (a) Adsorption vs. time. The solid lines represent experimental data at the temperatures indicated by color-coding, and the gray dashed lines represent fits to the data using the Avrami equation. Sample activation: 130 °C for 5 min under N<sub>2</sub>. The maximum adsorption capacity assuming one CO<sub>2</sub> per diamine is 16.0 g/100 g. (b) Rate of CO<sub>2</sub> adsorption vs. time corresponding to the data shown in (a). (c) Arrhenius plot for the Avrami rate constants ( $k_A$ ) corresponding to the fits shown in (a). The curved line represents a logarithmic fit to the data:  $y = 3.95 + 0.812 \cdot \ln(x - 0.00252)$ . Root mean square error (RMSE): 0.016. Range of the dependent variable: 1.72. RMSE / range = 0.0091. (d) Adsorption capacities and kinetic parameters corresponding to the data and fits shown in (a).

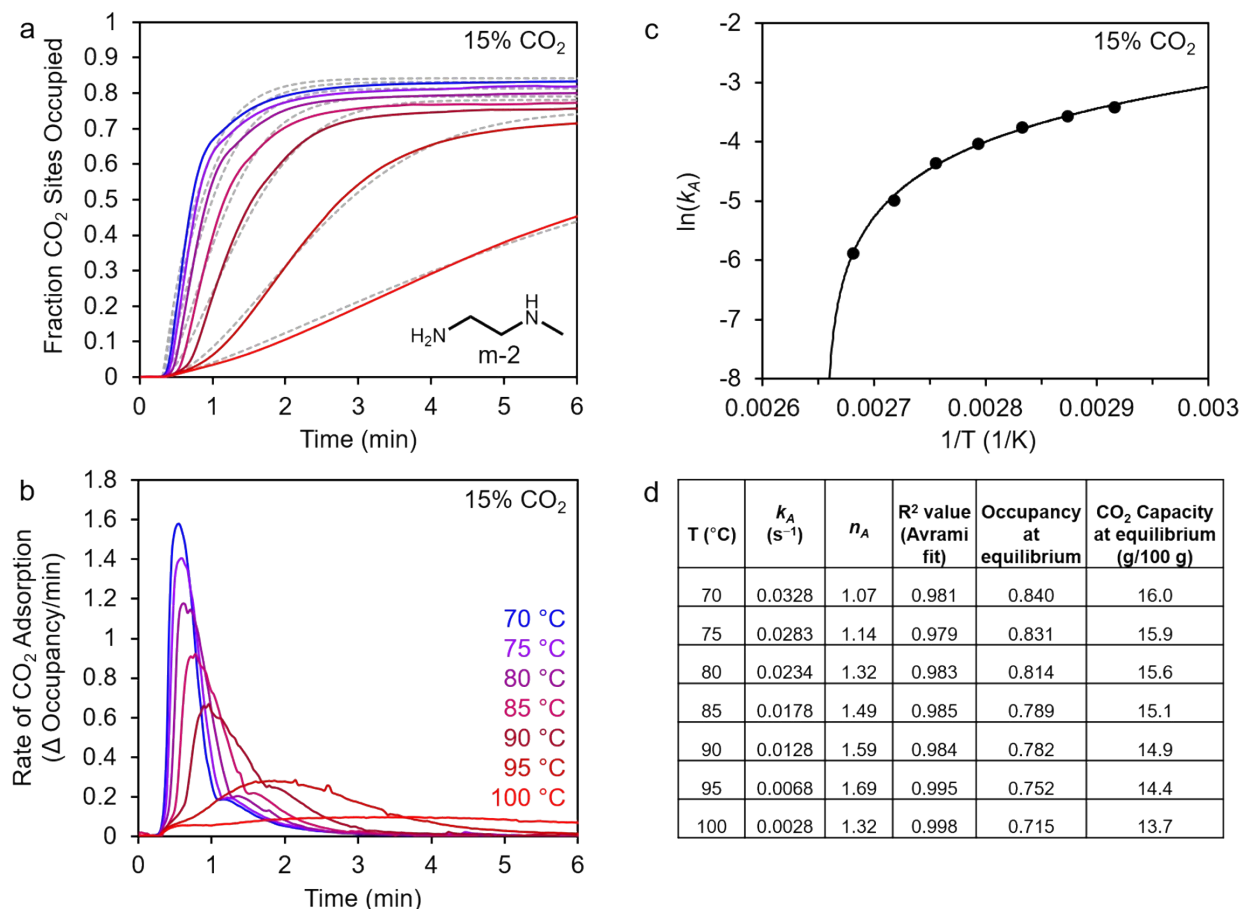

**Fig. S14.** Adsorption of CO<sub>2</sub> from a 15% stream by m-2-Mg<sub>2</sub>(dobpdc). (a) Adsorption vs. time. The solid lines represent experimental data at the temperatures indicated by color-coding, and the gray dashed lines represent fits to the data using the Avrami equation. Sample activation: 130 °C for 5 min under N<sub>2</sub>. The maximum adsorption capacity assuming one CO<sub>2</sub> per diamine is 18.8 g/100 g. (b) Rate of CO<sub>2</sub> adsorption vs. time corresponding to the data shown in (a). (c) Arrhenius plot for the Avrami rate constants ( $k_A$ ) corresponding to the fits shown in (a). The curved line represents a logarithmic fit to the data:  $y = 5.39 + 1.06 \cdot \ln(x - 0.00266)$ . Root mean square error (RMSE): 0.039. Range of the dependent variable: 2.51. RMSE / range = 0.016. (d) Adsorption capacities and kinetic parameters corresponding to the data and fits shown in (a).





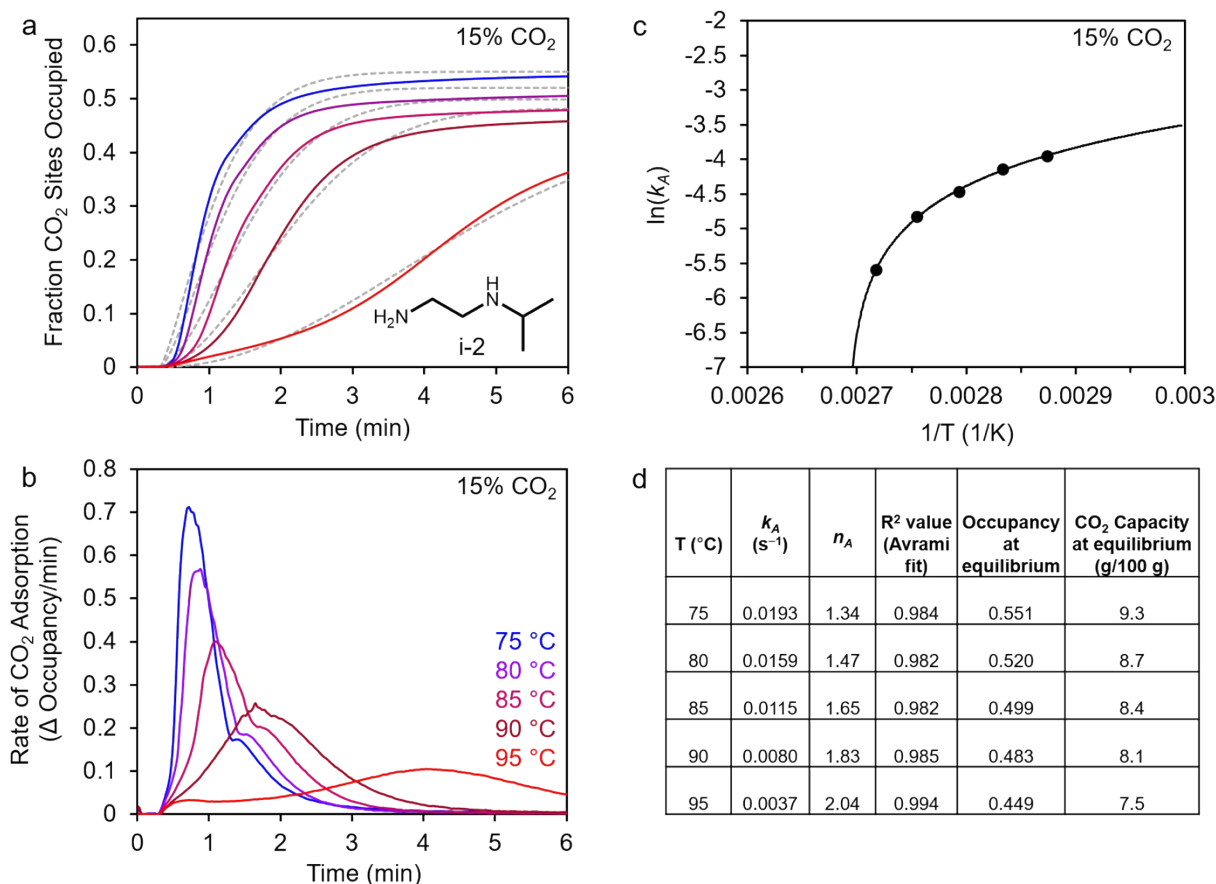

**Fig. S16.** Adsorption of CO<sub>2</sub> from a 15% stream by i-2-Mg<sub>2</sub>(dobpdc). (a) Adsorption vs. time. The solid lines represent experimental data at the temperatures indicated by color-coding, and the gray dashed lines represent fits to the data using the Avrami equation. Sample activation: 130 °C for 5 min under N<sub>2</sub>. The maximum adsorption capacity assuming one CO<sub>2</sub> per diamine is 16.8 g/100 g. (b) Rate of CO<sub>2</sub> adsorption vs. time corresponding to the data shown in (a). (c) Arrhenius plot for the Avrami rate constants ( $k_A$ ) corresponding to the fits shown in (a). The curved line represents a logarithmic fit to the data:  $y = 3.35 + 0.848 \cdot \ln(x - 0.00269)$ . Root mean square error (RMSE): 0.016. Range of the dependent variable: 1.64. RMSE / range = 0.0098. (d) Adsorption capacities and kinetic parameters corresponding to the data and fits shown in (a).

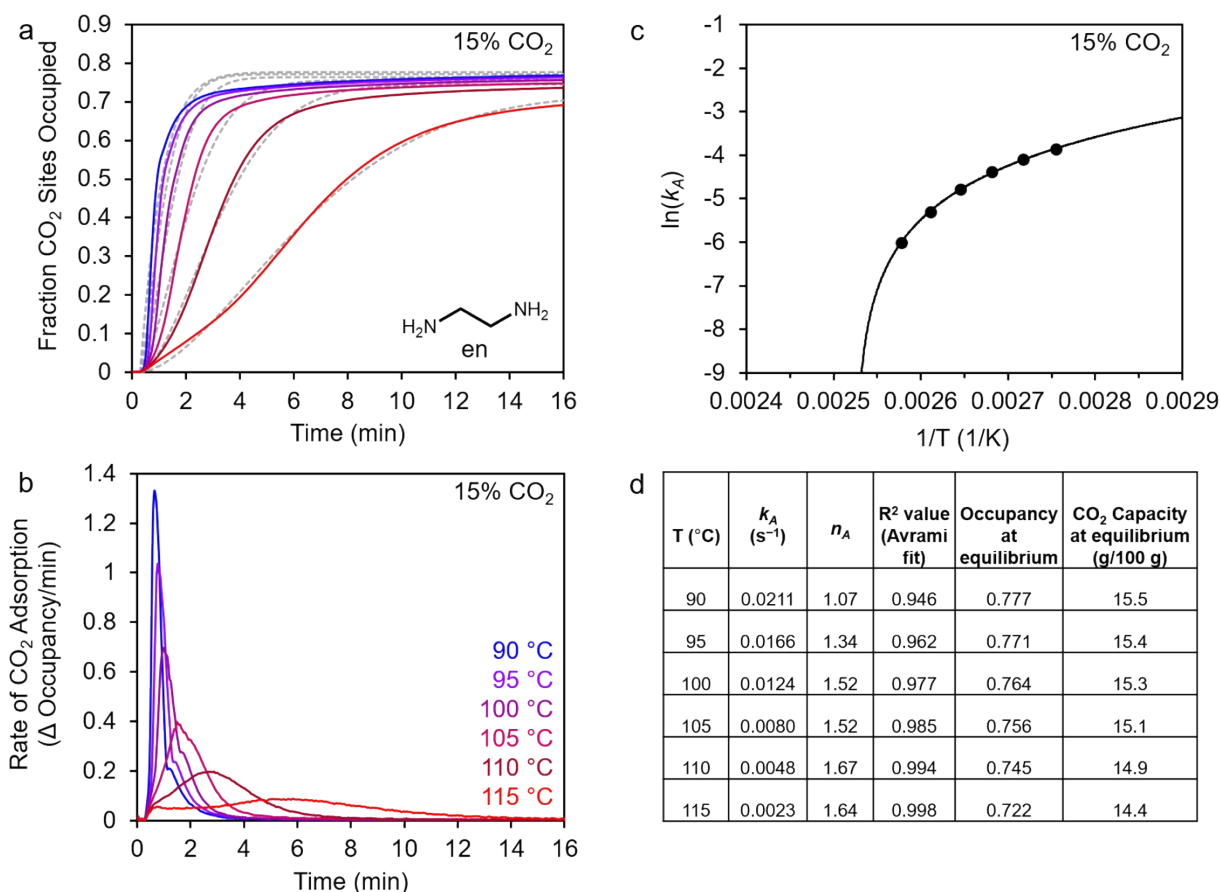

**Fig. S17.** Adsorption of CO<sub>2</sub> from a 15% stream by en-Mg<sub>2</sub>(dobpdc). (a) Adsorption vs. time. The solid lines represent experimental data at the temperatures indicated by color-coding, and the gray dashed lines represent fits to the data using the Avrami equation. Sample activation: 130 °C for 5 min under N<sub>2</sub>. The maximum adsorption capacity assuming one CO<sub>2</sub> per diamine is 20.0 g/100 g. (b) Rate of CO<sub>2</sub> adsorption vs. time corresponding to the data shown in (a). (c) Arrhenius plot for the Avrami rate constants ( $k_A$ ) corresponding to the fits shown in (a). The curved line represents a logarithmic fit to the data:  $y = 8.35 + 1.45 \cdot \ln(x - 0.00253)$ . Root mean square error (RMSE): 0.014. Range of the dependent variable: 2.16. RMSE / range = 0.0063. (d) Adsorption capacities and kinetic parameters corresponding to the data and fits shown in (a).

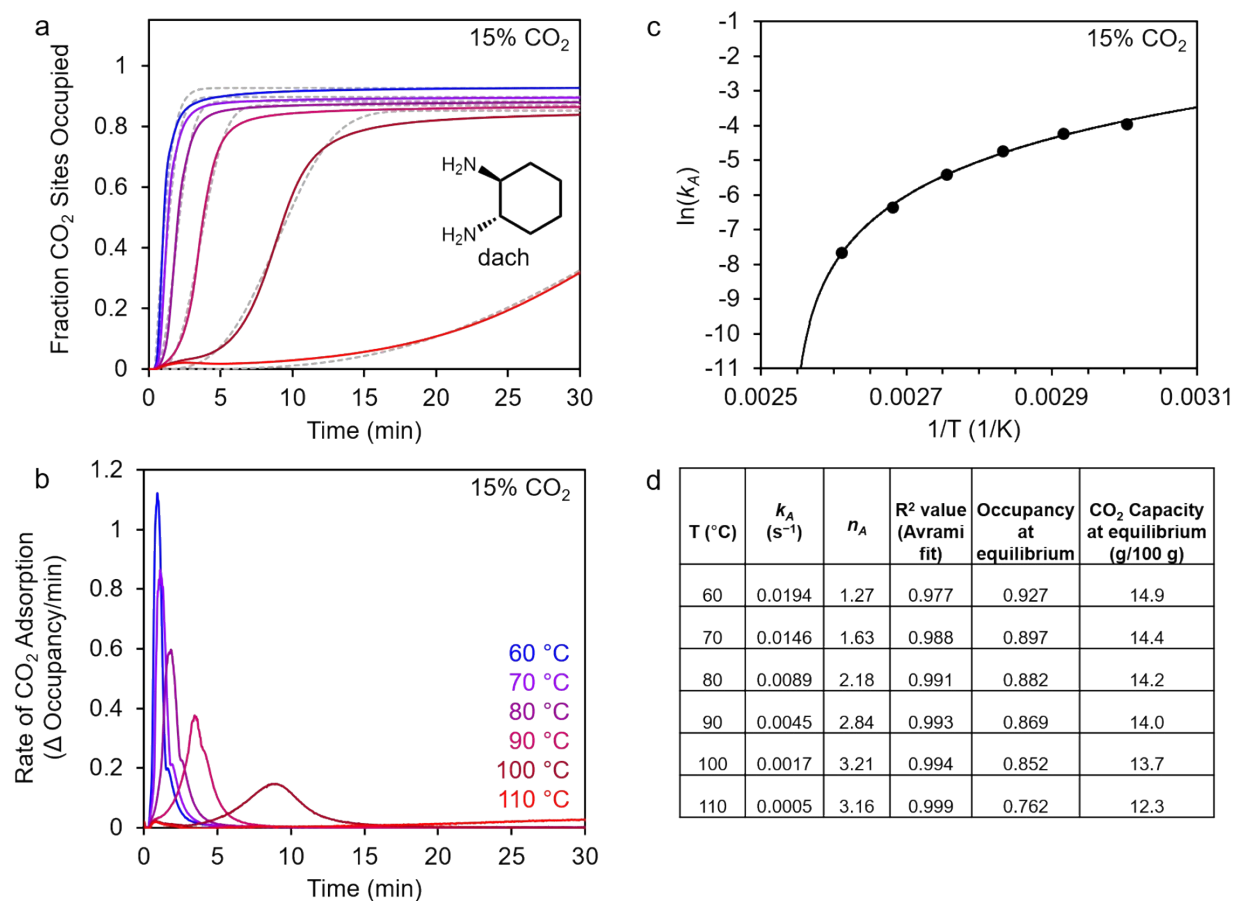

**Fig. S18.** Adsorption of CO<sub>2</sub> from a 15% stream by  $\pm$ -*trans*-dach-Mg<sub>2</sub>(dobpdc). (a) Adsorption vs. time. The solid lines represent experimental data at the temperatures indicated by color-coding, and the gray dashed lines represent fits to the data using the Avrami equation. Sample activation: 150 °C for 10 min under N<sub>2</sub>. The maximum adsorption capacity assuming one CO<sub>2</sub> per diamine is 16.1 g/100 g. (b) Rate of CO<sub>2</sub> adsorption vs. time corresponding to the data shown in (a). (c) Arrhenius plot for the Avrami rate constants ( $k_A$ ) corresponding to the fits shown in (a). (c) Arrhenius plot for the Avrami rate constants ( $k_A$ ) corresponding to the fits shown in (a). The curved line represents a logarithmic fit to the data:  $y = 11.7 + 2.03 \cdot \ln(x - 0.00254)$ . Root mean square error (RMSE): 0.060. Range of the dependent variable: 3.83. RMSE / range = 0.016. (d) Adsorption capacities and kinetic parameters corresponding to the data and fits shown in (a).

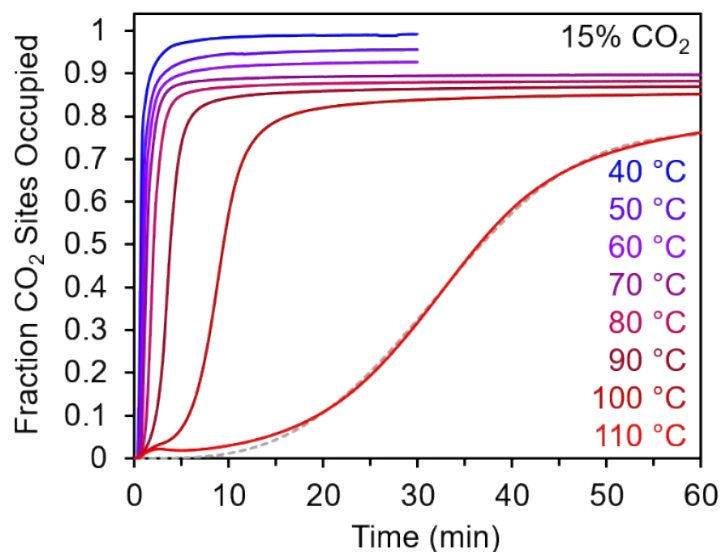

**Fig. S19.** Plot of CO<sub>2</sub> adsorption from a 15% CO<sub>2</sub> gas stream (balance N<sub>2</sub>) vs. time by  $\pm$ -*trans*-dach-Mg<sub>2</sub>(dobpdc), showing a longer time-scale on the *x*-axis and more temperature conditions compared to Fig. S18. This diamine variant exhibited an unusually long induction period. The gray dotted line represents a fit to the 110 °C data using the Avrami equation ( $n_A = 3.16$ ). Sample activation: 150 °C for 10 min under N<sub>2</sub>. “Fraction CO<sub>2</sub> sites occupied” indicates the ratio of adsorbed CO<sub>2</sub> molecules to dach molecules in the material. The maximum adsorption capacity assuming one CO<sub>2</sub> per diamine is 16.1 g/100 g.

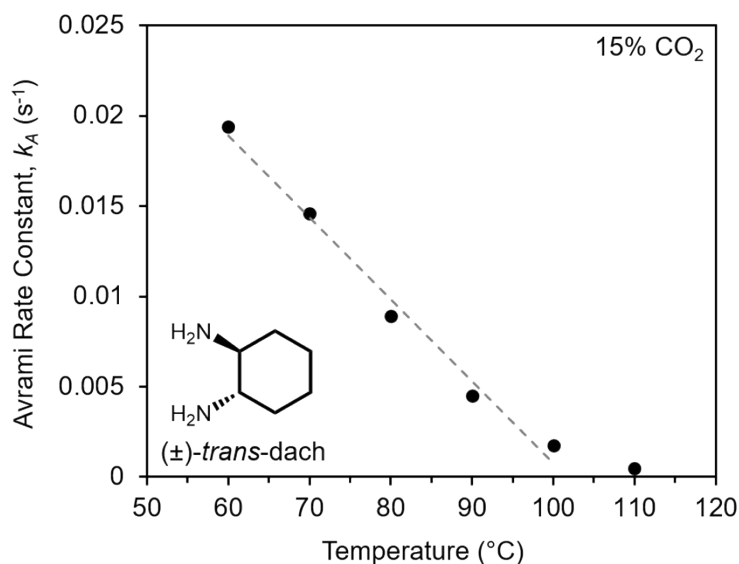

**Fig. S20.** Plot of Avrami rate constant ( $k_A$ ) vs. temperature for  $\text{CO}_2$  adsorption from a 15% stream in  $(\pm)\text{-trans-dach-Mg}_2(\text{dobpdc})$ . The data points corresponding to 60–100  $^{\circ}\text{C}$  followed a linear trend, but the 110  $^{\circ}\text{C}$  data point—which was clearly below the step temperature based on the data shown in Figs. S18–19—deviated from this trend.

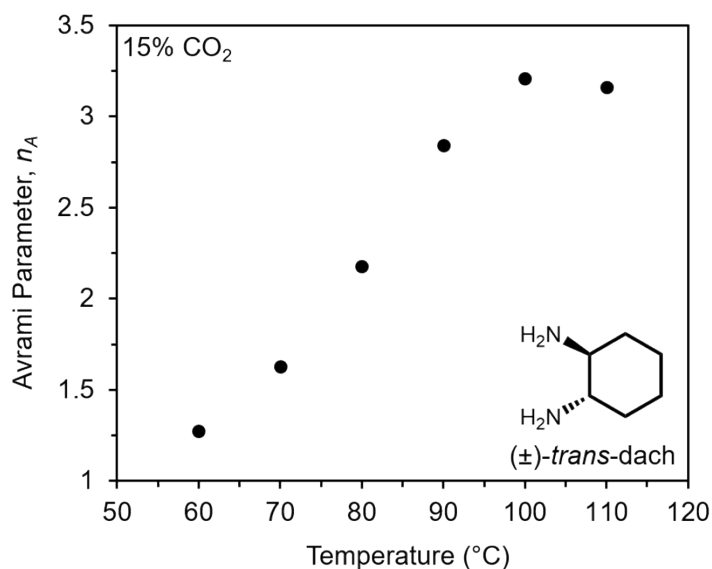

**Fig. S21.** Plot of Avrami rate parameter ( $n_A$ ) vs. temperature for  $\text{CO}_2$  adsorption from a 15% stream in  $(\pm)\text{-trans-dach-Mg}_2(\text{dobpdc})$ .

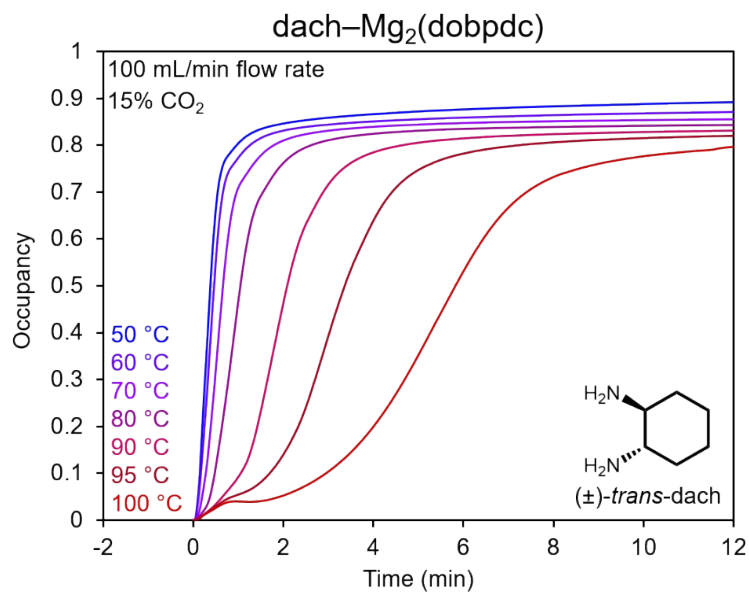

**Fig. S22.** The induction period for CO<sub>2</sub> adsorption from a 15% stream in dach-Mg<sub>2</sub>(dobpdc) can be reduced by using faster flow rates. However, sigmoidal kinetics are observed even when a flow rate of 100 mL/min is used.

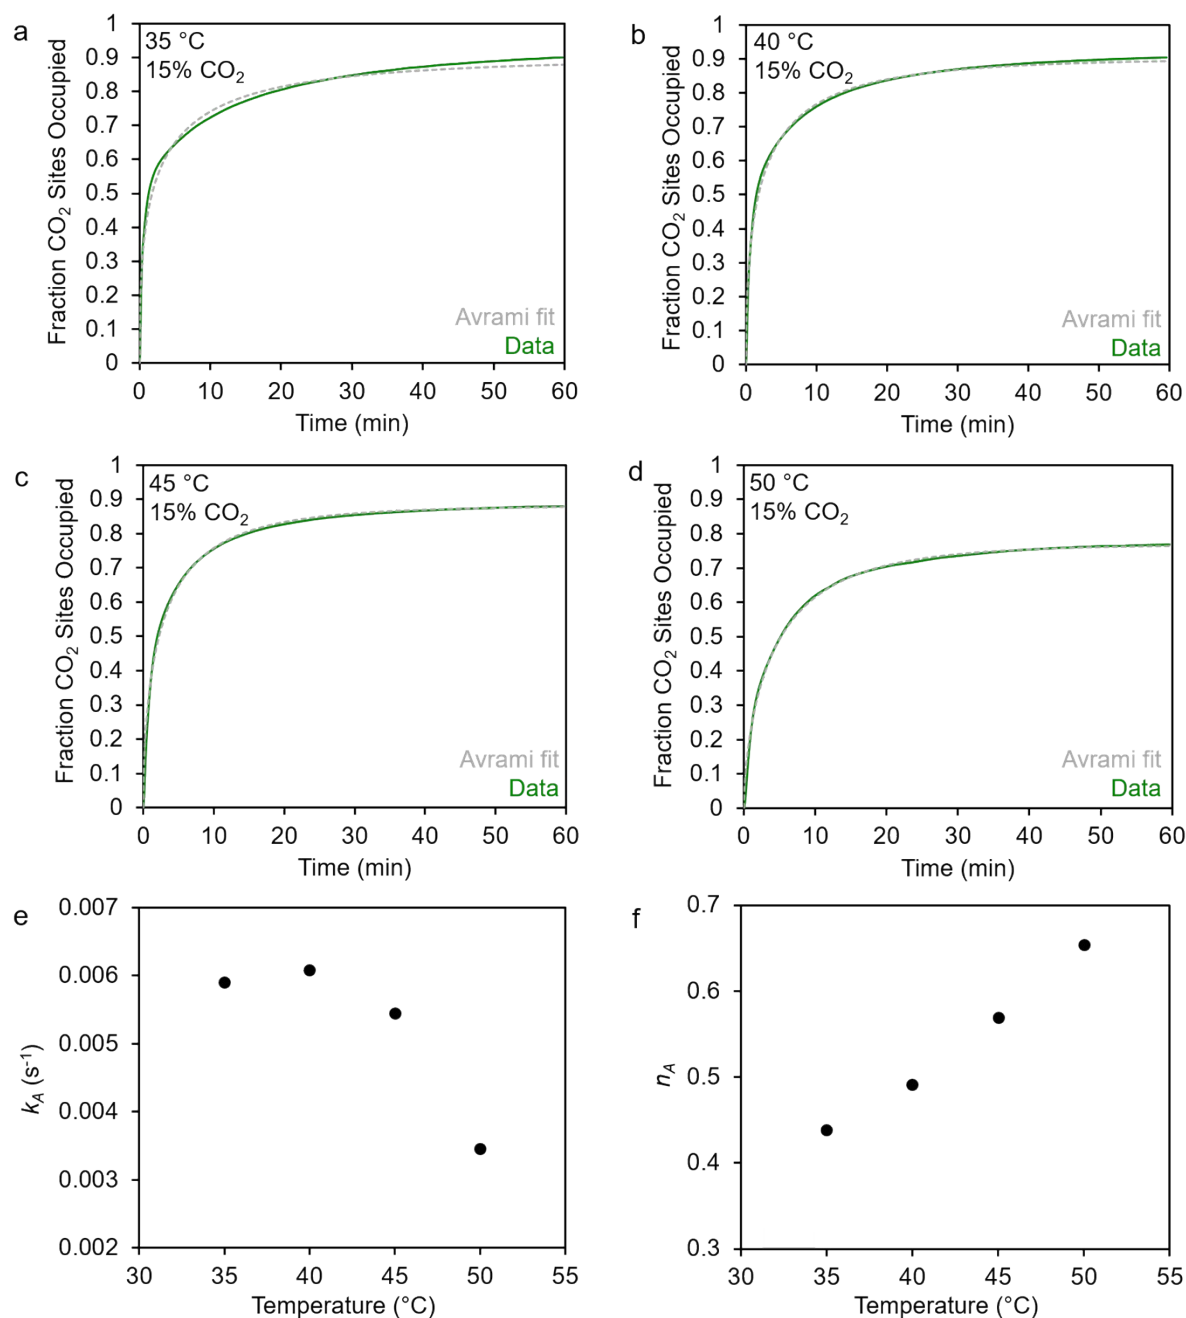

**Fig. S23.** Avrami model fits for CO<sub>2</sub> adsorption from a 15% stream by dmpn–Mg<sub>2</sub>(dobpdc) from a 15% CO<sub>2</sub> stream; these are the same data as in Fig. 10 in the main text. Panels a, b, c, and d present Avrami fits overlaid with experimental data for adsorption at 35, 40, 45, and 50 °C, respectively. Panels e and f present the Avrami rate constant ( $k_A$ ) and Avrami parameter ( $n_A$ ) vs. temperature, respectively, derived from the data presented in panels a–d. For the 55 °C adsorption experiment, the mass had not equilibrated after 60 minutes, so the Avrami model was not applied.



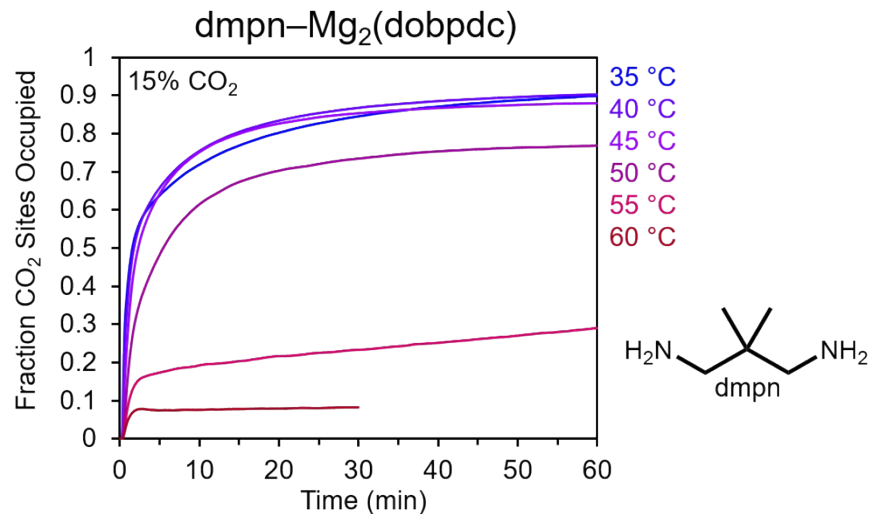

**Fig. S24.** Adsorption kinetics for dmpn-Mg<sub>2</sub>(dobpdc) from a 15% CO<sub>2</sub> stream; these are the same data as in Fig. 10 in the main text, except a longer time scale is shown in the *x*-axis. For the 55 °C adsorption experiment, the mass had not equilibrated after 60 minutes.

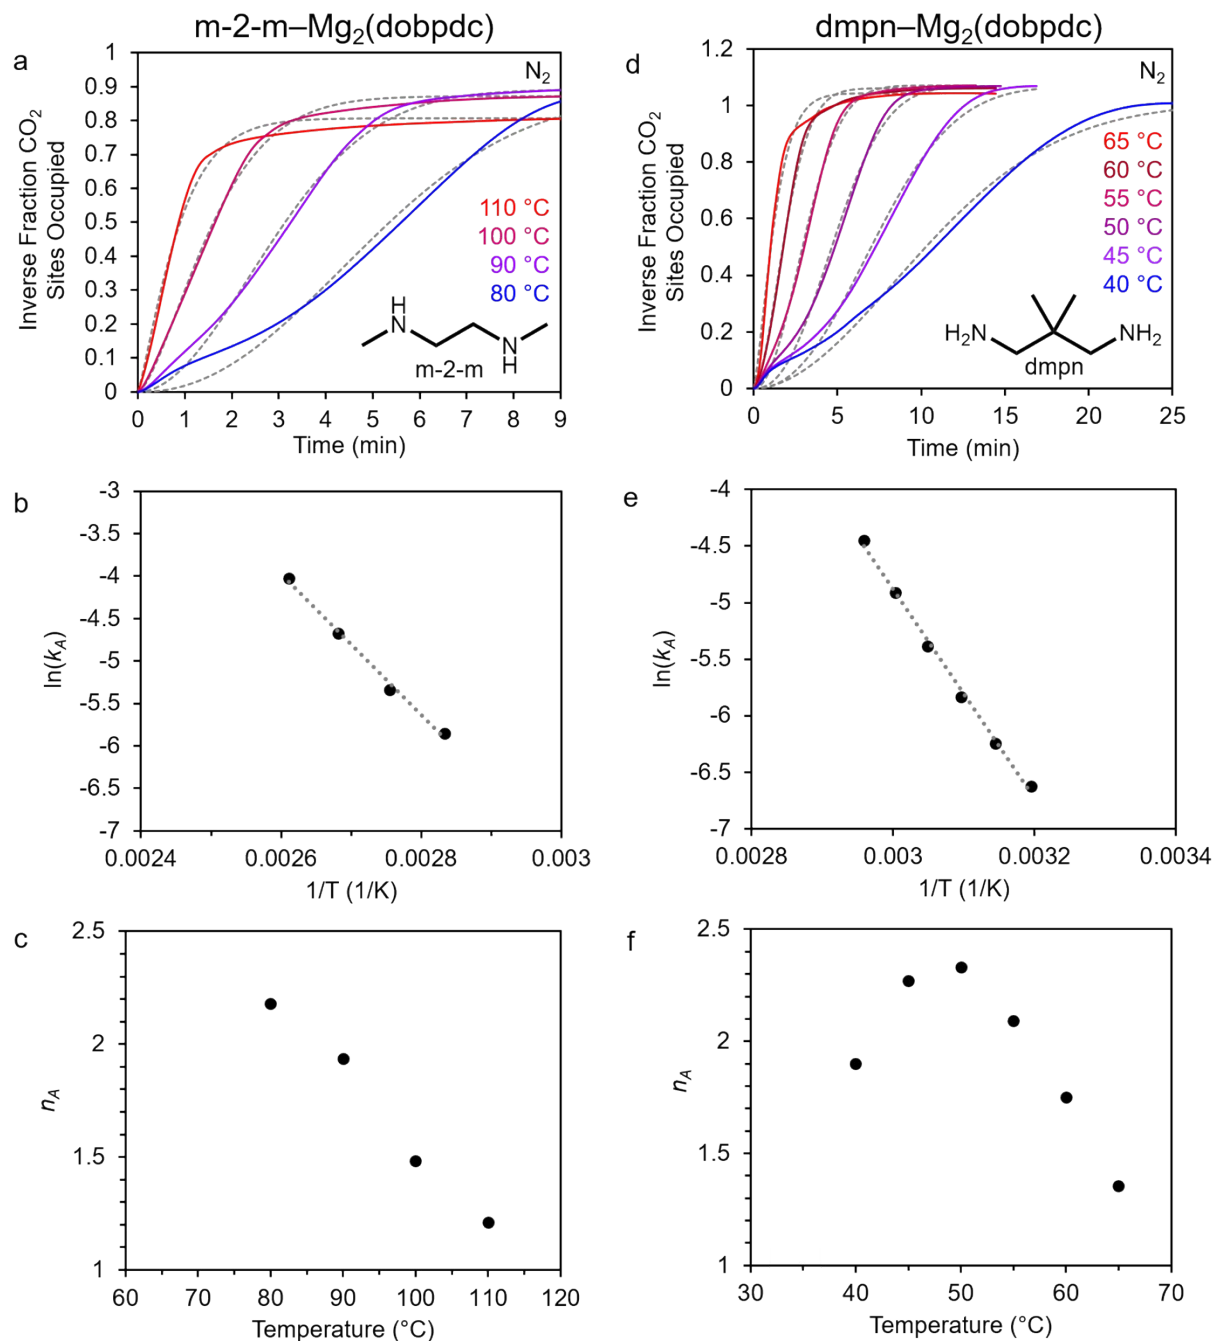

**Fig. S25.** Avrami fits to dry N<sub>2</sub> desorption kinetic data for m-2-m-Mg<sub>2</sub>(dobpdc) and dmpn-Mg<sub>2</sub>(dobpdc), corresponding to the data shown in Fig. 11 in the main text. Data are presented as “inverse occupancy” to facilitate visualization of the induction period characteristic of the Avrami model. In these experiments, equilibrium adsorption was reached under a 100% CO<sub>2</sub> stream at each indicated temperature, and the gas stream was switched to dry N<sub>2</sub> to initiate desorption. (a) Kinetics of CO<sub>2</sub> desorption from m-2-m-Mg<sub>2</sub>(dobpdc) under a dry N<sub>2</sub> stream. The y-axis, “Inverse Fraction CO<sub>2</sub> Sites Occupied,” is defined as  $Q_i - Q_t$ , where  $Q_i$  is the initial CO<sub>2</sub> capacity before the introduction of N<sub>2</sub>. The solid lines represent experimental data at the temperatures indicated, and

the gray dashed lines represent fits to the data using the Avrami equation. (b) Arrhenius plot for the Avrami rate constants ( $k_A$ ) corresponding to the fits shown in (a). The data exhibit normal Arrhenius behavior. (c) Plot of the Avrami parameter,  $n_A$ , vs. temperature, corresponding to the fits shown in (a). (d) Kinetics of CO<sub>2</sub> desorption from dmpn–Mg<sub>2</sub>(dobpdc) under a dry N<sub>2</sub> stream. The y-axis is as defined in (a). The solid lines represent experimental data at the temperatures indicated by color-coding, and the gray dashed lines represent fits to the data using the Avrami equation. (e) Arrhenius plot for the Avrami rate constants ( $k_A$ ) corresponding to the fits shown in (d). The data follow Arrhenius behavior. (f) Plot of the Avrami parameter,  $n_A$ , vs. temperature, corresponding to the fits shown in (d).

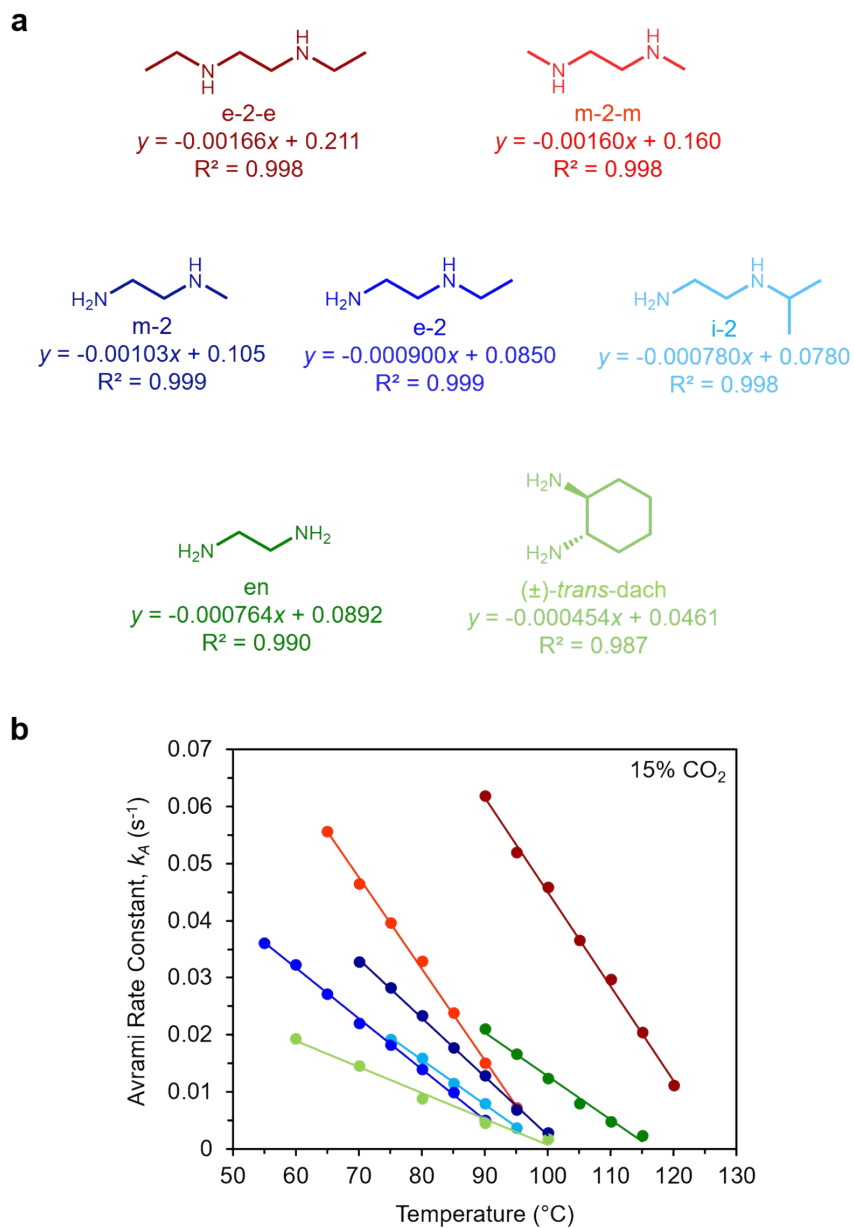

**Fig. S26.** Linear regressions for rate constants and Avrami parameters for 15% CO<sub>2</sub> adsorption by diamine-appended Mg<sub>2</sub>(dobpdc) variants. Panels a and b here are the same as Fig. 9a and b, respectively, in the main text, except linear regression data are included here in panel a.

## References

- (1) Siegelman, R. L.; McDonald, T. M.; Gonzalez, M. I.; Martell, J. D.; Milner, P. J.; Mason, J. A.; Berger, A. H.; Bhowan, A. S.; Long, J. R. Controlling Cooperative CO<sub>2</sub> Adsorption in Diamine-Appended Mg<sub>2</sub>(dobpdc) Metal–Organic Frameworks. *J. Am. Chem. Soc.* **2017**, *139* (30), 10526–10538.
- (2) Milner, P. J.; Siegelman, R. L.; Forse, A. C.; Gonzalez, M. I.; Runčevski, T.; Martell, J. D.; Reimer, J. A.; Long, J. R. A Diaminopropane-Appended Metal–Organic Framework Enabling Efficient CO<sub>2</sub> Capture from Coal Flue Gas via a Mixed Adsorption Mechanism. *J. Am. Chem. Soc.* **2017**, *139* (38), 13541–13553.
- (3) Martell, J. D.; Porter-Zasada, L. B.; Forse, A. C.; Siegelman, R. L.; Gonzalez, M. I.; Oktawiec, J.; Runčevski, T.; Xu, J.; Srebro-Hooper, M.; Milner, P. J.; et al. Enantioselective Recognition of Ammonium Carbamates in a Chiral Metal–Organic Framework. *J. Am. Chem. Soc.* **2017**, *139* (44), 16000–16012.
- (4) McDonald, T. M.; Lee, W. R.; Mason, J. A.; Wiers, B. M.; Hong, C. S.; Long, J. R. Capture of Carbon Dioxide from Air and Flue Gas in the Alkylamine-Appended Metal–Organic Framework Mmen-Mg<sub>2</sub>(dobpdc). *J. Am. Chem. Soc.* **2012**, *134* (16), 7056–7065.
- (5) Mason, J. A.; Sumida, K.; Herm, Z. R.; Krishna, R.; Long, J. R. Evaluating Metal–Organic Frameworks for Post-Combustion Carbon Dioxide Capture via Temperature Swing Adsorption. *Energy Environ. Sci.* **2011**, *4* (8), 3030–3040.
